# Supplementary material for: Cannabis use is not associated with altered levels of physical activity: evidence from the repeated cross-sectional Belgian Health Interview Survey
Source: Springer Nature journal article supplement (doi:10.1186/s42238-025-00278-8), 2025-04-25
Supplement: MOESM3 [file 42238_2025_278_MOESM3_ESM.pdf]

1           In the current dataset, missing values occurred for all variables except for year, age,  
2 gender, urbanization and province. There were 68 different patterns of missing variables in the  
3 dataset (see Table S3). Looking at the first two rows of Table S3, there were 19936 subjects  
4 with all variables observed and 3189 subjects with an unobserved income. Table S3 reveals  
5 that 582 participants did not report their past-month cannabis use. Due to the illicit nature of  
6 cannabis use, it might be the case that users are more likely to not report their cannabis use as  
7 compared to non-users. Finally, 1610 participants did not report their physical activity level.  
8 As physical activity is the outcome variable, we do not expect participants with missing data  
9 in any of the predictor variables to have a different distribution of physical exercise compared  
10 to complete cases. The reason for this assumed independence is that we do not see any  
11 reasons why participants with specific higher or lower values in certain covariates would be  
12 more/less likely to report their physical activity (e.g. why people with higher education would  
13 be more reluctant to report their physical activity level). Of course, this is still an assumption  
14 based on intuition and subject matter knowledge, there still might be a level of dependence  
15 between missingness in physical activity and any of the predictors.

**Table S3**

*Patterns of missing data with respective frequencies*

| Cannabis | Physical | Education | Income | Depression | Anxiety | GALI | Frequency |
|----------|----------|-----------|--------|------------|---------|------|-----------|
| X        | X        | X         | X      | X          | X       | X    | 19936     |
| X        | X        | X         |        | X          | X       | X    | 3189      |
| X        |          | X         | X      | X          | X       | X    | 1610      |
| X        |          | X         |        | X          | X       | X    | 277       |
|          | X        | X         | X      | X          | X       | X    | 582       |
|          | X        | X         |        | X          | X       | X    | 116       |
|          |          | X         | X      | X          | X       | X    | 173       |
|          |          | X         |        | X          | X       | X    | 35        |
| X        | X        | X         | X      | X          |         | X    | 34        |
| X        | X        | X         |        | X          |         | X    | 6         |
| X        |          | X         | X      | X          |         | X    | 12        |
| X        |          | X         |        | X          |         | X    | 1         |
|          | X        | X         | X      | X          |         | X    | 10        |
|          | X        | X         |        | X          |         | X    | 1         |
|          |          | X         | X      | X          |         | X    | 12        |
|          |          | X         |        | X          |         | X    | 2         |
| X        | X        | X         | X      |            | X       | X    | 10        |
| X        | X        | X         |        |            | X       | X    | 1         |
| X        |          | X         | X      |            | X       | X    | 6         |
| X        |          | X         |        |            | X       | X    | 1         |
|          | X        | X         | X      |            | X       | X    | 2         |
|          |          | X         | X      |            | X       | X    | 2         |
| X        | X        | X         | X      |            |         | X    | 197       |
| X        | X        | X         |        |            |         | X    | 28        |
| X        |          | X         | X      |            |         | X    | 65        |
| X        |          | X         |        |            |         | X    | 12        |
|          | X        | X         | X      |            |         | X    | 87        |
|          | X        | X         |        |            |         | X    | 20        |
|          |          | X         | X      |            |         | X    | 84        |
|          |          | X         |        |            |         | X    | 16        |
| X        | X        | X         | X      | X          | X       |      | 323       |
| X        | X        | X         |        | X          | X       |      | 47        |
| X        |          | X         | X      | X          | X       |      | 39        |
| X        |          | X         |        | X          | X       |      | 3         |
|          | X        | X         | X      | X          | X       |      | 26        |
|          | X        | X         |        | X          | X       |      | 2         |
|          |          | X         | X      | X          | X       |      | 16        |
| X        | X        | X         | X      | X          |         |      | 1         |
| X        |          | X         | X      | X          |         |      | 2         |
|          | X        | X         | X      | X          |         |      | 1         |
|          |          | X         | X      | X          |         |      | 2         |
| X        | X        | X         | X      |            | X       |      | 1         |
| X        | X        | X         |        |            | X       |      | 1         |

|   |   |   |   |   |   |   |     |
|---|---|---|---|---|---|---|-----|
|   | X | X | X |   | X |   | 2   |
|   | X | X |   |   | X |   | 1   |
|   |   | X | X |   | X |   | 1   |
| X | X | X | X |   |   |   | 25  |
| X | X | X |   |   |   |   | 4   |
| X |   | X | X |   |   |   | 4   |
| X |   | X |   |   |   |   | 1   |
|   | X | X | X |   |   |   | 26  |
|   | X | X |   |   |   |   | 4   |
|   |   | X | X |   |   |   | 37  |
|   |   | X |   |   |   |   | 14  |
| X | X |   | X | X | X | X | 240 |
| X | X |   |   | X | X | X | 57  |
| X |   |   | X | X | X | X | 18  |
| X |   |   |   | X | X | X | 6   |
|   | X |   | X | X | X | X | 13  |
|   | X |   |   | X | X | X | 2   |
|   |   |   | X | X | X | X | 3   |
| X | X |   | X |   |   | X | 1   |
| X | X |   |   |   |   | X | 1   |
|   | X |   | X |   |   | X | 2   |
|   | X |   |   |   |   | X | 1   |
|   |   |   |   |   |   | X | 2   |
| X | X |   | X | X | X |   | 7   |
|   |   |   | X |   |   |   | 1   |

*Note.* Cells containing an 'X' refers to the variable being observed, whereas empty cells reflect that the corresponding variable was not observed.
